# Supplementary material for: Tumor Mutational Burden and Efficacy of Immune Checkpoint Inhibitors: A Systematic Review and Meta-Analysis
Source: PubMed Central journal article supplement (PMC6895916; doi:10.3390/cancers11111798), 2019-11-15
Supplement: cancers-11-01798-s001.pdf [file cancers-11-01798-s001.pdf]

# Tumor Mutational Burden and Efficacy of Immune Checkpoint Inhibitors: A Systematic Review and Meta-Analysis

Jong Yeob Kim, Andreas Kronbichler, Michael Eisenhut, Sung Hwi Hong, Hans J. van der Vliet, Jeonghyun Kang, Jae Il Shin and Gabriele Gamberith

**Table S1.** Results of random-effects, fixed-effects, heterogeneity and Egger *p* value of all meta-analyses.

| Meta-analysis                                                      | Number of Studies | Number of Participants | Random Effects Summary Estimate | Random Effects <i>p</i> Value | Fixed Effects Summary Estimate | Fixed Effects <i>p</i> Value | I <sup>2</sup> | Egger <i>p</i> Value |
|--------------------------------------------------------------------|-------------------|------------------------|---------------------------------|-------------------------------|--------------------------------|------------------------------|----------------|----------------------|
| Overall survival, high TMB vs low TMB                              | 19                | 2609                   | 0.53 (0.42 to 0.67)             | 0.000000053                   | 0.53 (0.42 to 0.67)            | 0.000000053                  | 0              | 0.5                  |
| Progression-free survival, high TMB vs low TMB                     | 19                | 1151                   | 0.52 (0.40 to 0.67)             | 0.0000011                     | 0.52 (0.40 to 0.67)            | 0.0000011                    | 0              | 0.48                 |
| Overall survival, high TMB, immunotherapy vs chemotherapy          | 5                 | 2329                   | 0.69 (0.50 to 0.95)             | 0.023                         | 0.69 (0.50 to 0.95)            | 0.023                        | 0              | 0.63                 |
| Overall survival, low TMB, immunotherapy vs chemotherapy           | 4                 | 2118                   | 0.78 (0.60 to 1.00)             | 0.051                         | 0.78 (0.60 to 1.00)            | 0.051                        | 0              | 0.12                 |
| Progression-free survival, high TMB, immunotherapy vs chemotherapy | 5                 | 2013                   | 0.66 (0.47 to 0.92)             | 0.014                         | 0.66 (0.47 to 0.92)            | 0.014                        | 0              | 0.86                 |
| Progression-free survival, low TMB, immunotherapy vs chemotherapy  | 3                 | 1574                   | 1.14 (0.83 to 1.57)             | 0.41                          | 1.12 (0.85 to 1.48)            | 0.4                          | 21             | 0.097                |

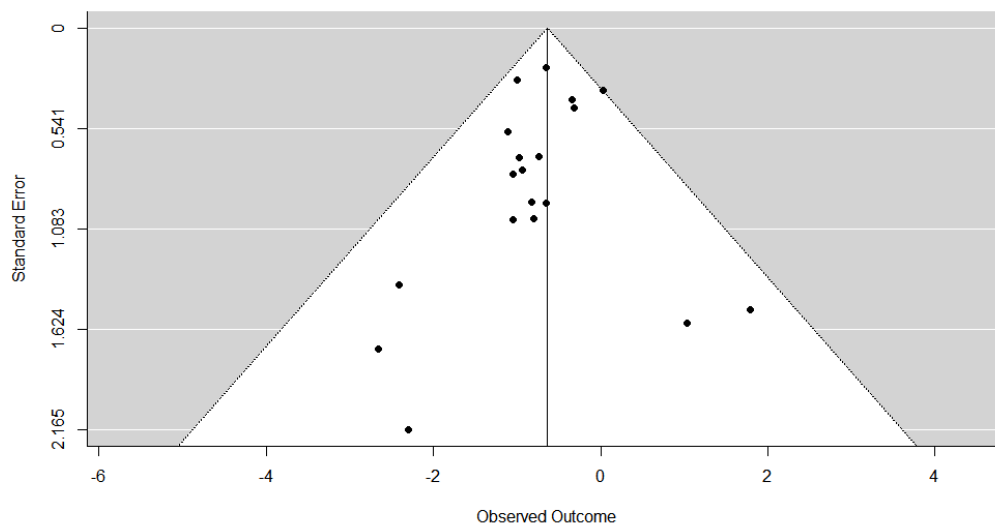

Figure S1. Overall survival, high TMB vs low TMB, funnel plot.

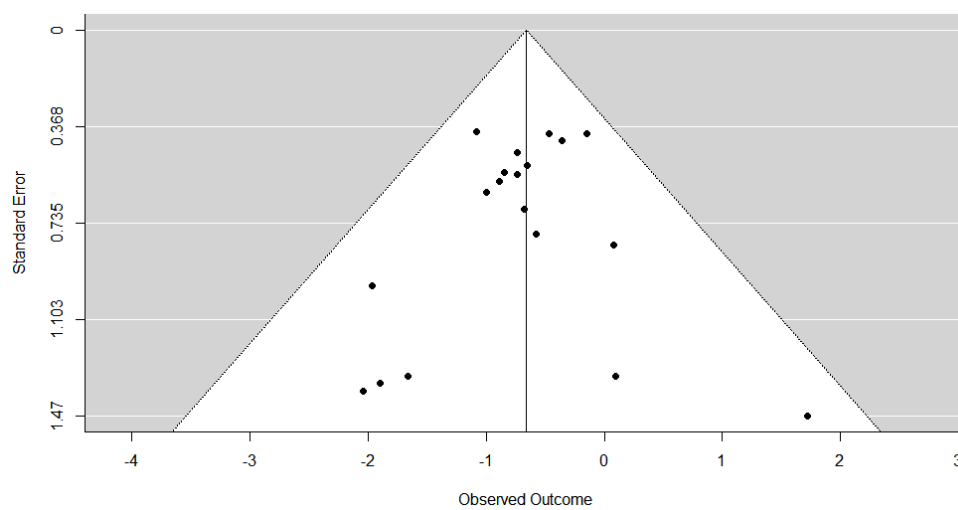

Figure S2. Progression-free survival, high TMB vs low TMB, funnel plot.

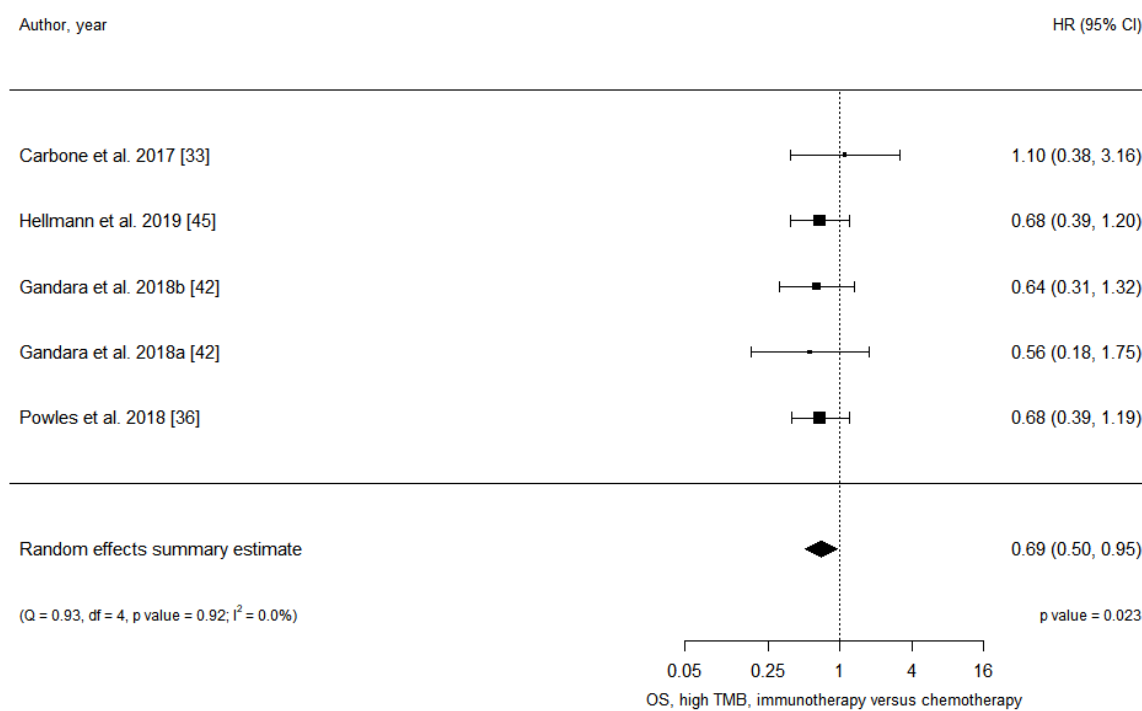

**Figure S3.** Overall survival, high TMB, immunotherapy vs chemotherapy, random-effects model.

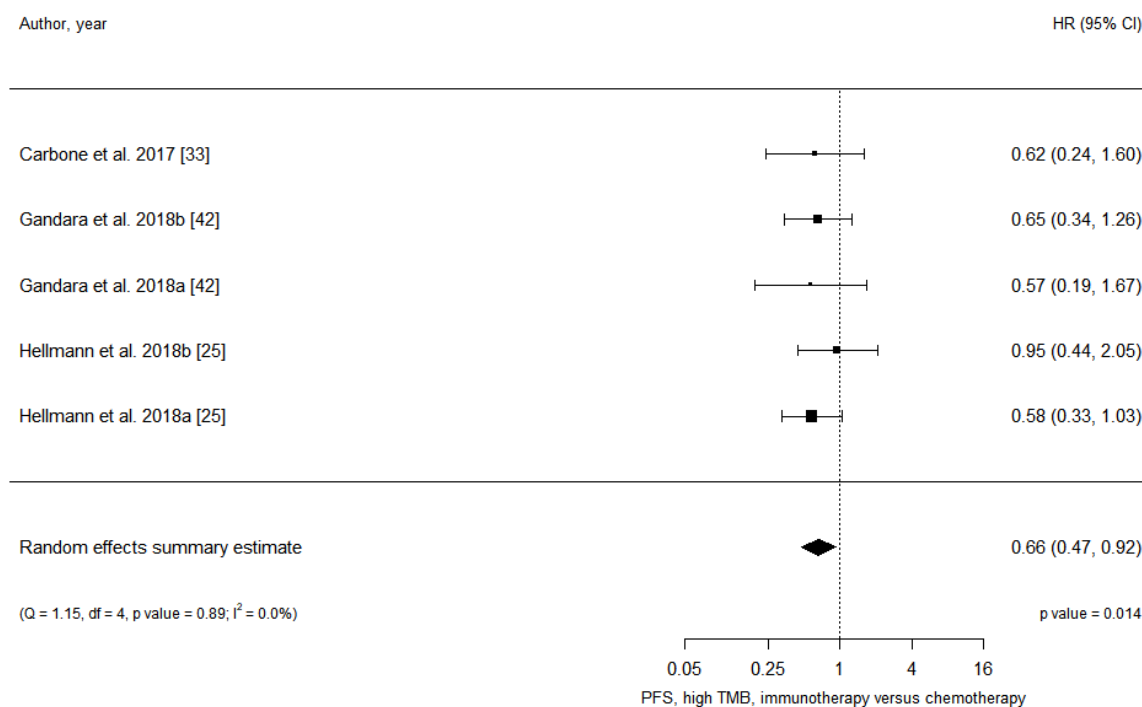

**Figure S4.** Progression-free survival, high TMB, immunotherapy vs chemotherapy, random-effects model.

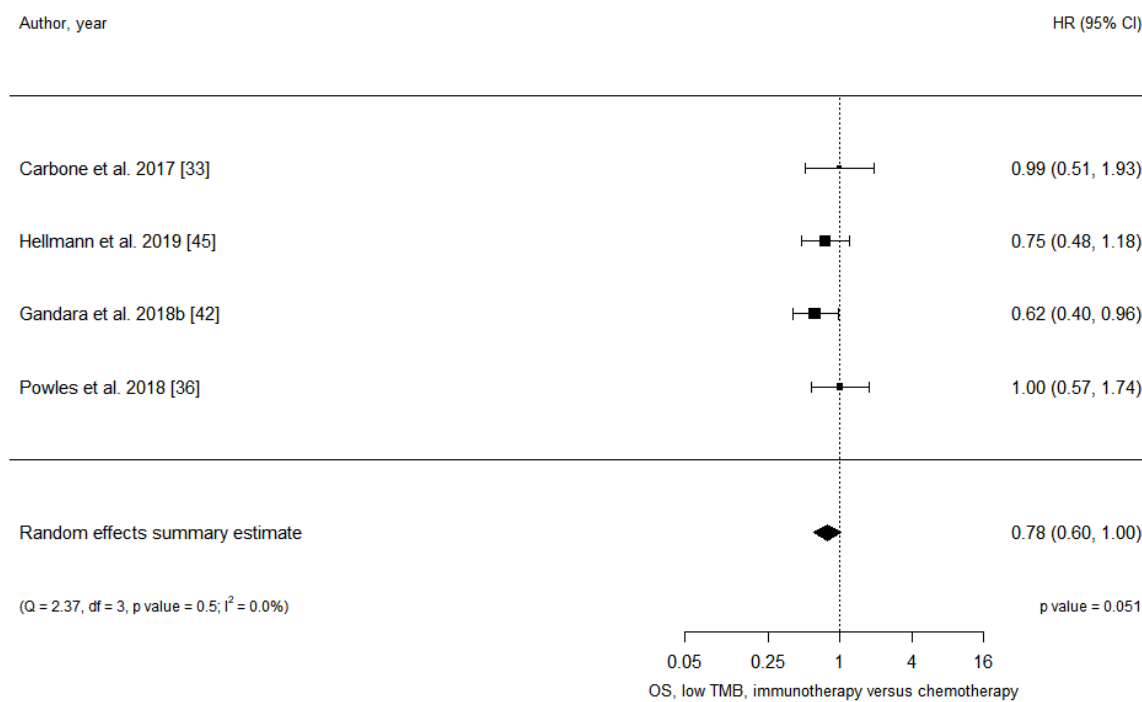

**Figure S5.** Overall survival, low TMB, immunotherapy vs chemotherapy, random-effects model.

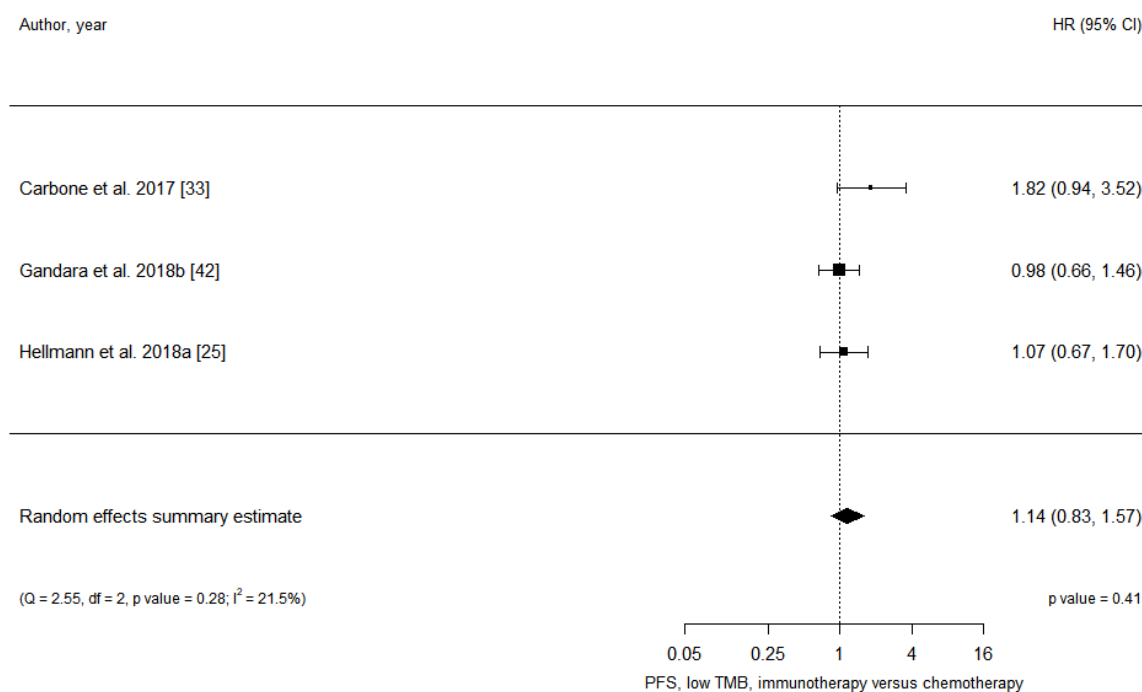

**Figure S6.** Progression-free survival, low TMB, immunotherapy vs chemotherapy, random-effects model.

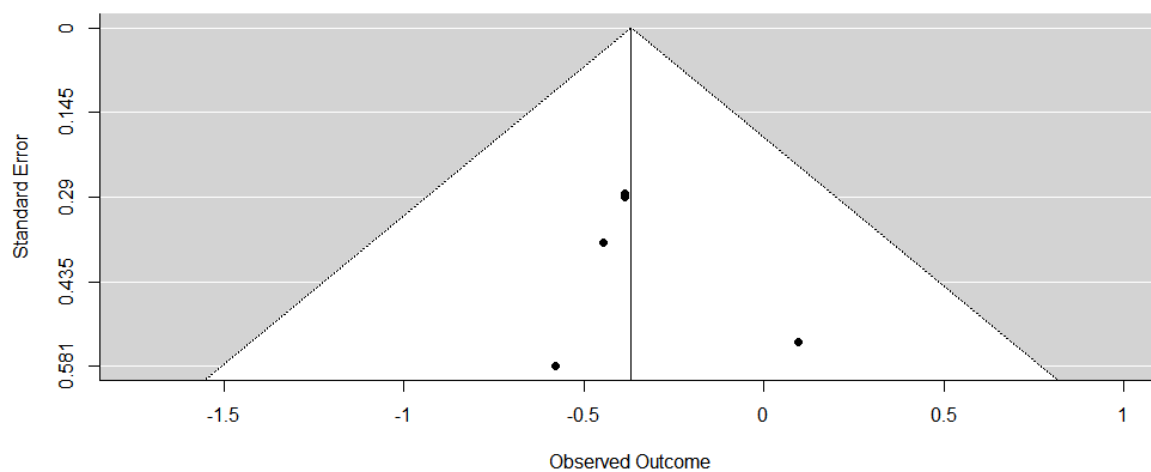

Figure S7. Overall survival, high TMB, immunotherapy vs chemotherapy, funnel plot.

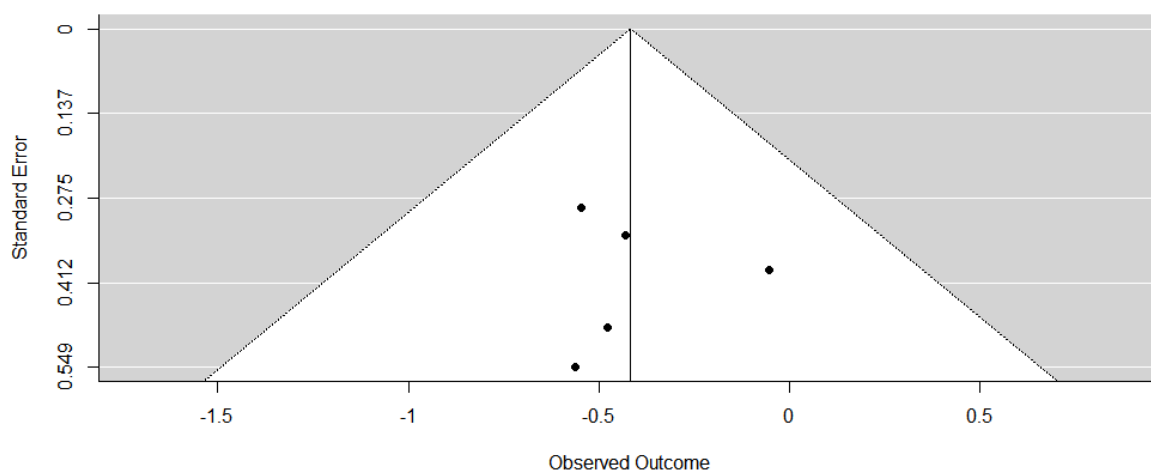

Figure S8. Progression-free survival, high TMB, immunotherapy vs chemotherapy, funnel plot.

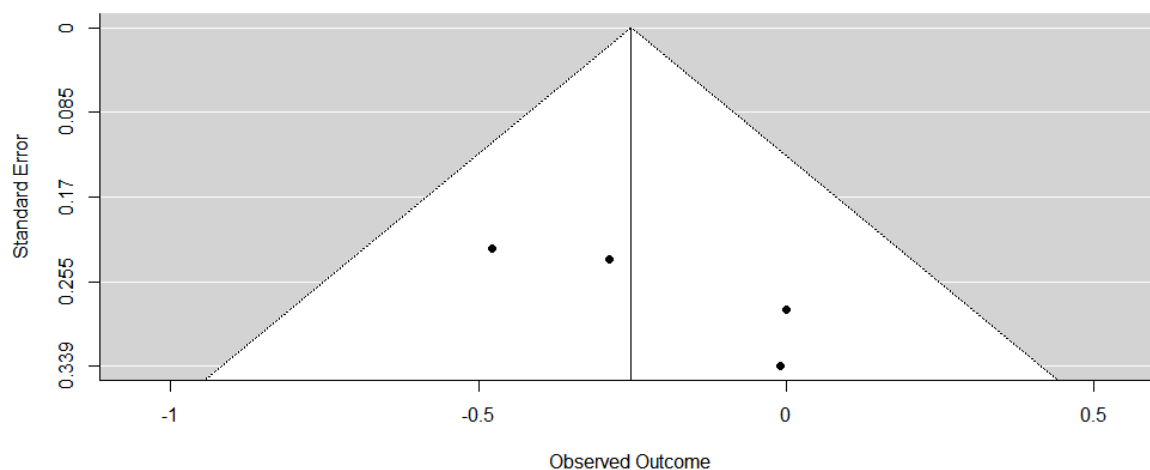

**Figure S9.** Overall survival, low TMB, immunotherapy vs chemotherapy, funnel plot.

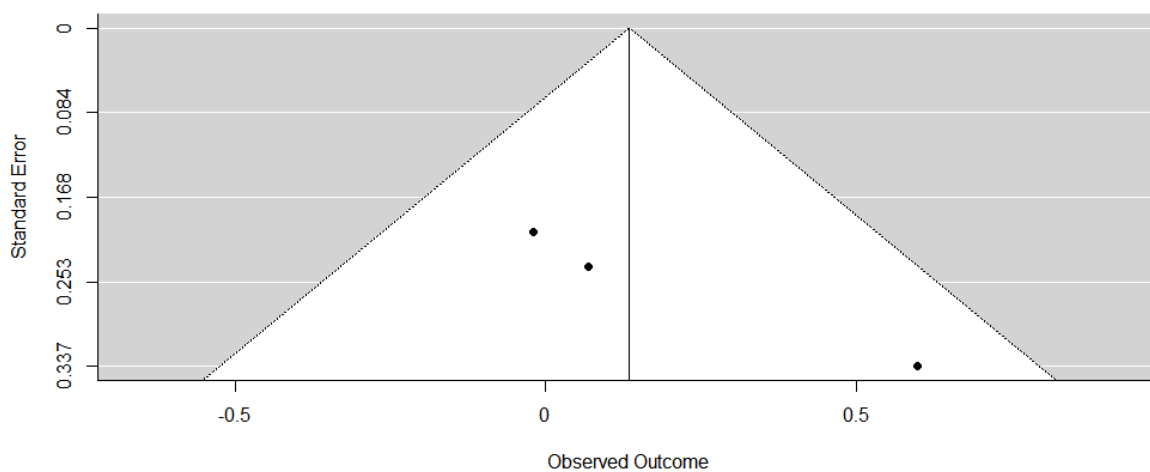

**Figure S10.** Progression-free survival, low TMB, immunotherapy vs chemotherapy, funnel plot.

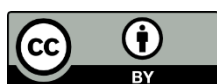

© 2019 by the authors. Licensee MDPI, Basel, Switzerland. This article is an open access article distributed under the terms and conditions of the Creative Commons Attribution (CC BY) license (<http://creativecommons.org/licenses/by/4.0/>).
